# Supplementary material for: High-parameter cytometry unmasks microglial cell spatio-temporal response kinetics in severe neuroinflammatory disease
Source: PubMed Central journal article supplement (PMC8314570; doi:10.1186/s12974-021-02214-y), 2021-07-26
Supplement: 12974_2021_2214_MOESM7_ESM.pdf [file 12974_2021_2214_MOESM7_ESM.pdf]

**Mock - d0****WNV - d7****P2RY12<sup>hi</sup> CD86<sup>+</sup>****P2RY12<sup>hi</sup> CD86<sup>-</sup>****P2RY12<sup>lo</sup> CD86<sup>+</sup>****P2RY12<sup>lo</sup> CD86<sup>-</sup>**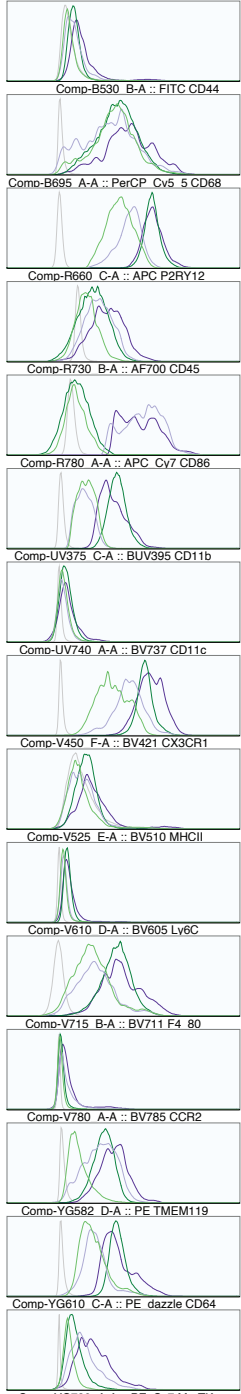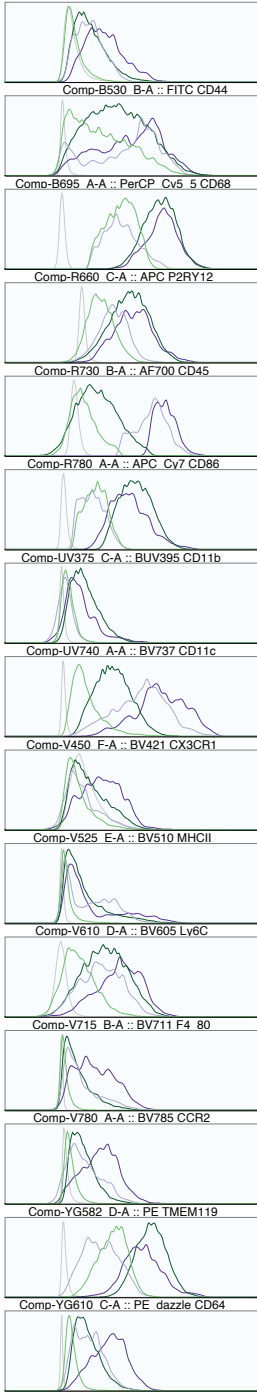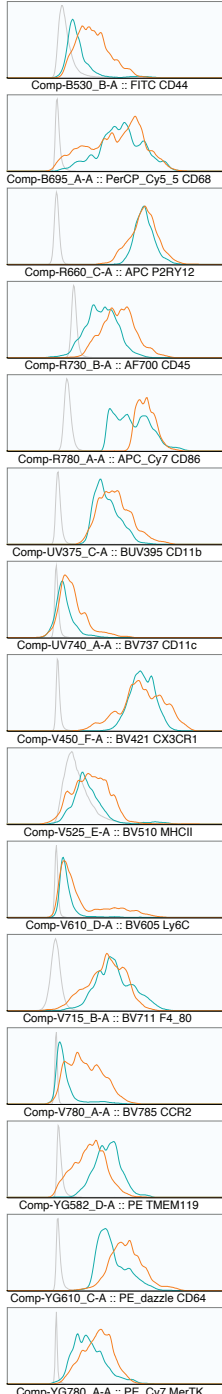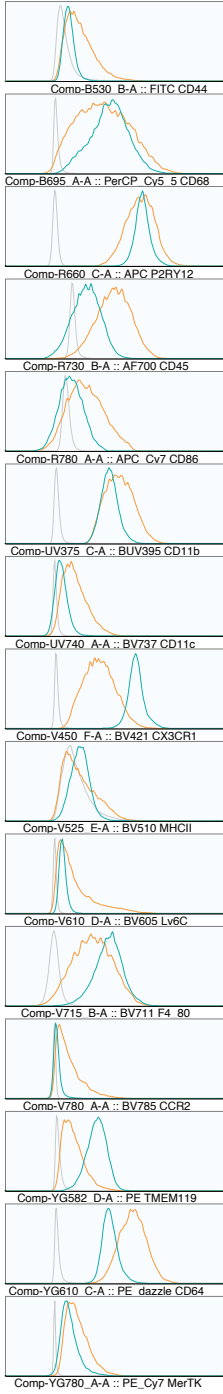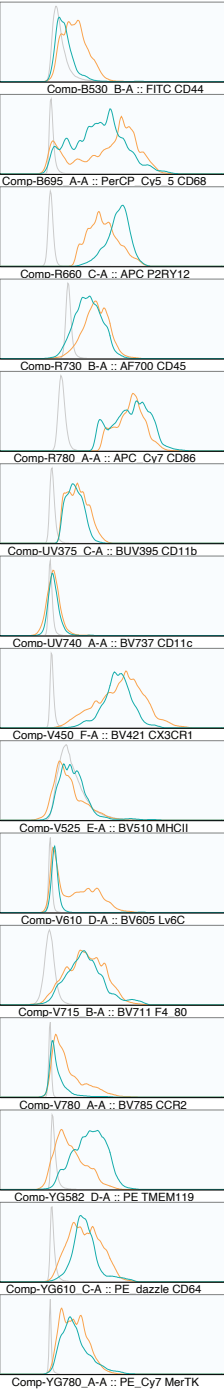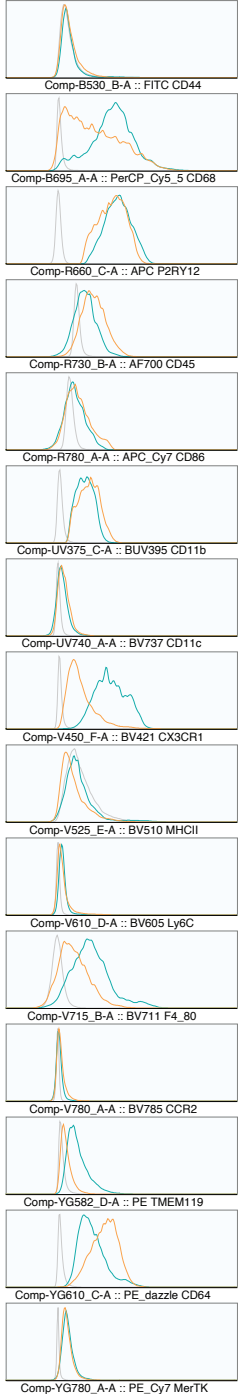

**P2RY12<sup>hi</sup> CD86<sup>+</sup>**  
**P2RY12<sup>hi</sup> CD86<sup>-</sup>**

**P2RY12<sup>lo</sup> CD86<sup>+</sup>**  
**P2RY12<sup>lo</sup> CD86<sup>-</sup>**

**Mock - d0****WNV - d7**
