# Supplementary material for: High-parameter cytometry unmasks microglial cell spatio-temporal response kinetics in severe neuroinflammatory disease
Source: PubMed Central journal article supplement (PMC8314570; doi:10.1186/s12974-021-02214-y), 2021-07-26
Supplement: 12974_2021_2214_MOESM10_ESM.pdf [file 12974_2021_2214_MOESM10_ESM.pdf]

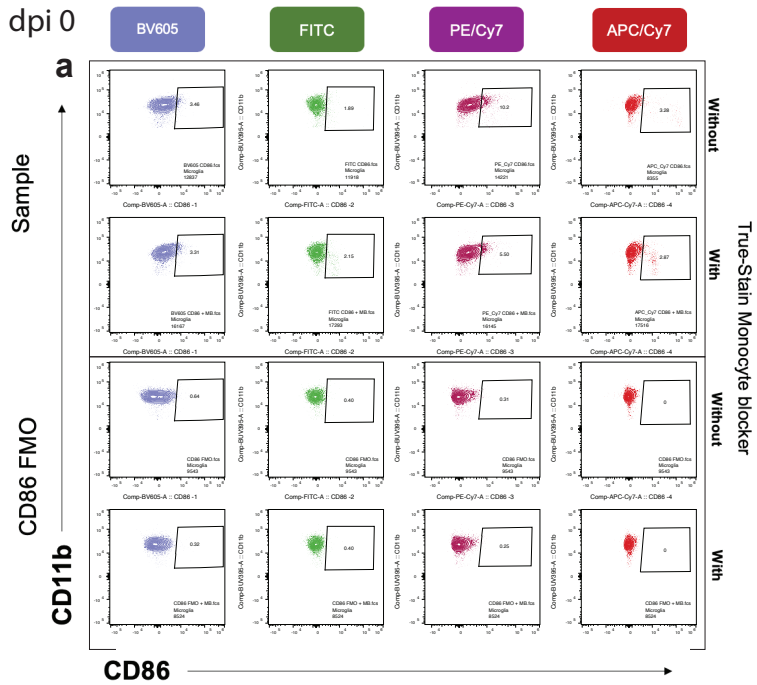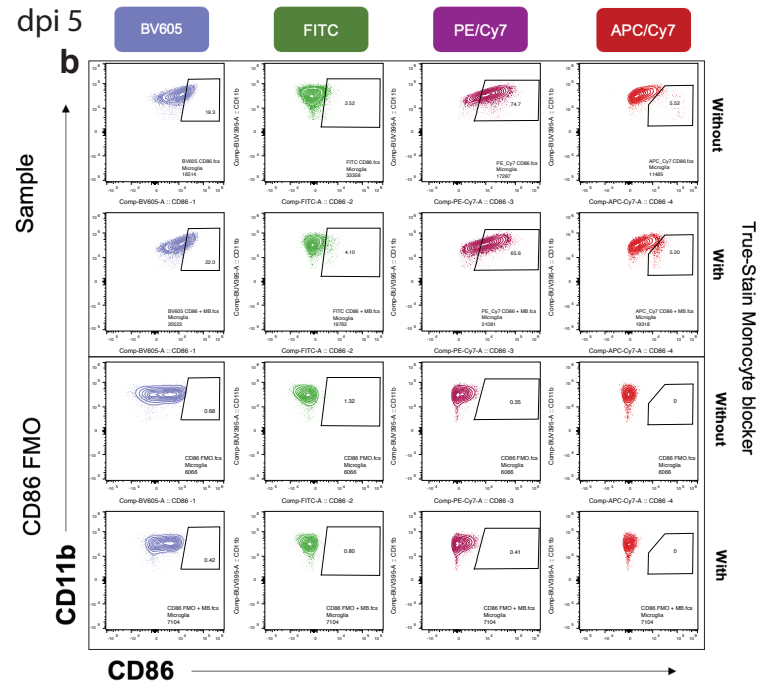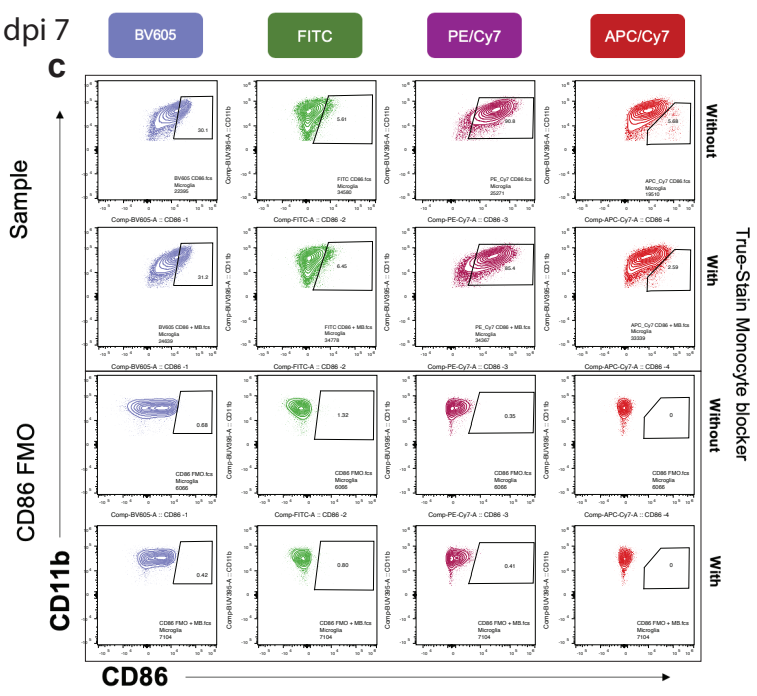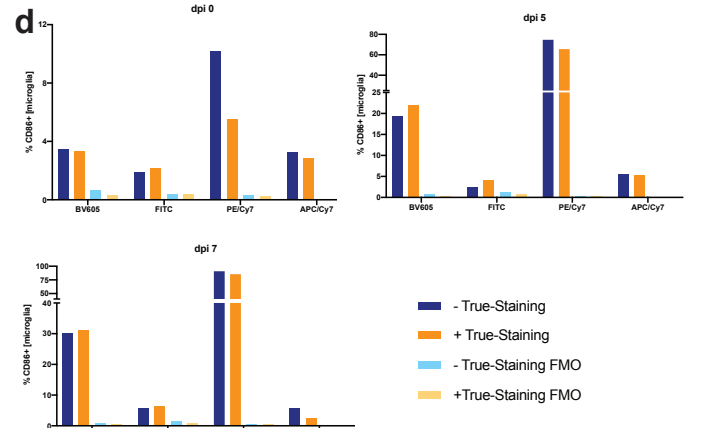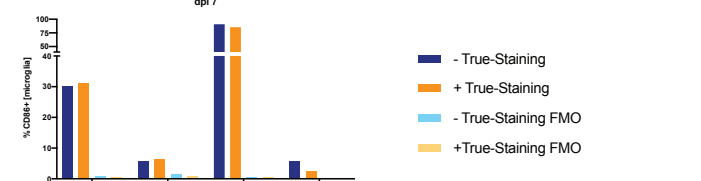

■ - True-Staining  
 ■ + True-Staining  
 ■ - True-Staining FMO  
 ■ + True-Staining FMO
