# Supplementary material for: High-parameter cytometry unmasks microglial cell spatio-temporal response kinetics in severe neuroinflammatory disease
Source: PubMed Central journal article supplement (PMC8314570; doi:10.1186/s12974-021-02214-y), 2021-07-26
Supplement: 12974_2021_2214_MOESM11_ESM.pdf [file 12974_2021_2214_MOESM11_ESM.pdf]

**P2RY12<sup>hi</sup> CD86<sup>+</sup> microglia**

**P2RY12<sup>hi</sup> CD86<sup>-</sup> microglia**

**P2RY12<sup>lo</sup> CD86<sup>+</sup> microglia**

**P2RY12<sup>lo</sup> CD86<sup>-</sup> microglia**

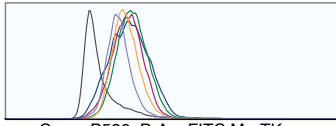

Comp-B530\_B-A :: FITC MerTK

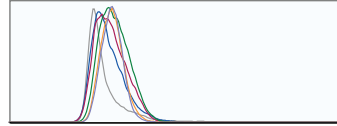

Comp-B530\_B-A :: FITC MerTK

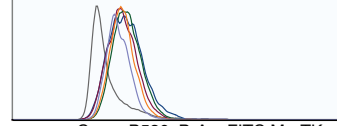

Comp-B530\_B-A :: FITC MerTK

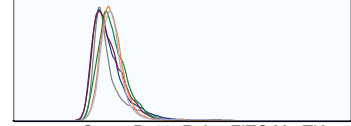

Comp-B530\_B-A :: FITC MerTK

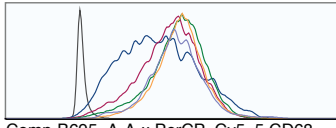

Comp-B695\_A-A :: PerCP\_Cy5\_5 CD68

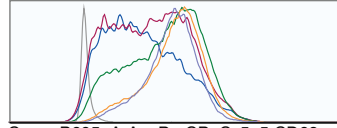

Comp-B695\_A-A :: PerCP\_Cy5\_5 CD68

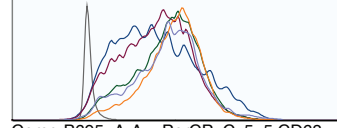

Comp-B695\_A-A :: PerCP\_Cy5\_5 CD68

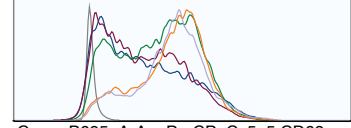

Comp-B695\_A-A :: PerCP\_Cy5\_5 CD68

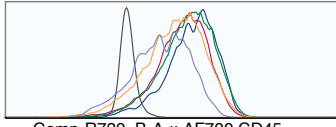

Comp-R730\_B-A :: AF700 CD45

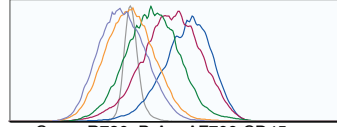

Comp-R730\_B-A :: AF700 CD45

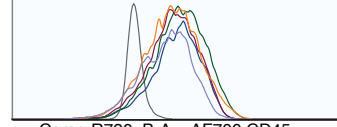

Comp-R730\_B-A :: AF700 CD45

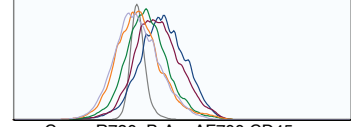

Comp-R730\_B-A :: AF700 CD45

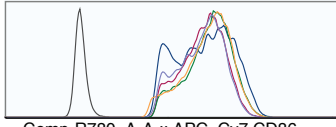

Comp-R780\_A-A :: APC\_Cy7 CD86

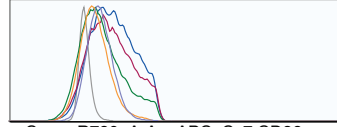

Comp-R780\_A-A :: APC\_Cy7 CD86

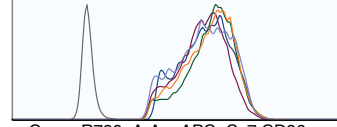

Comp-R780\_A-A :: APC\_Cy7 CD86

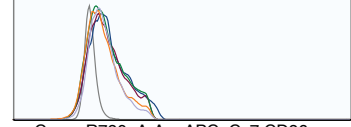

Comp-R780\_A-A :: APC\_Cy7 CD86

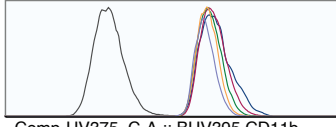

Comp-UV375\_C-A :: BUV395 CD11b

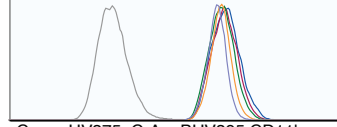

Comp-UV375\_C-A :: BUV395 CD11b

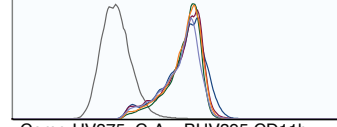

Comp-UV375\_C-A :: BUV395 CD11b

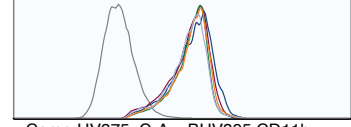

Comp-UV375\_C-A :: BUV395 CD11b

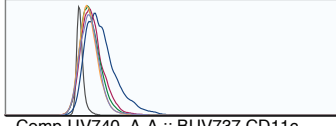

Comp-UV740\_A-A :: BUV737 CD11c

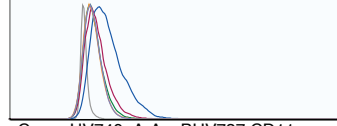

Comp-UV740\_A-A :: BUV737 CD11c

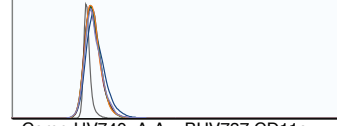

Comp-UV740\_A-A :: BUV737 CD11c

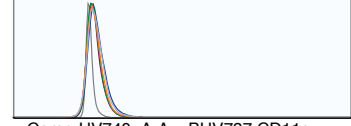

Comp-UV740\_A-A :: BUV737 CD11c

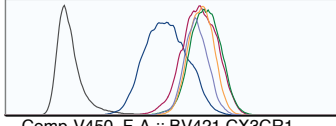

Comp-V450\_F-A :: BV421 CX3CR1

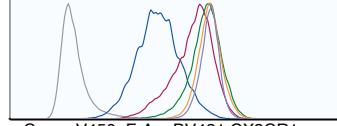

Comp-V450\_F-A :: BV421 CX3CR1

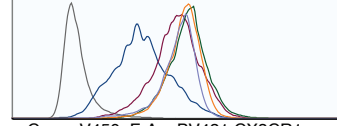

Comp-V450\_F-A :: BV421 CX3CR1

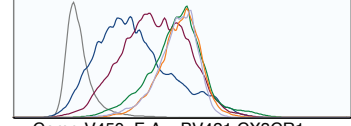

Comp-V450\_F-A :: BV421 CX3CR1

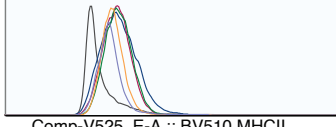

Comp-V525\_E-A :: BV510 MHCII

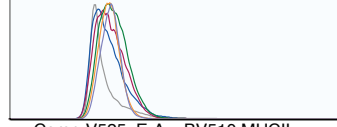

Comp-V525\_E-A :: BV510 MHCII

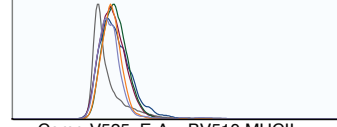

Comp-V525\_E-A :: BV510 MHCII

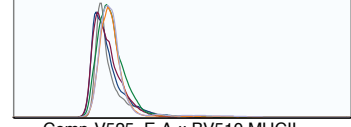

Comp-V525\_E-A :: BV510 MHCII

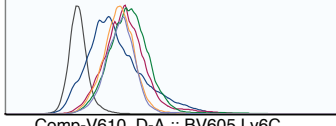

Comp-V610\_D-A :: BV605 Ly6C

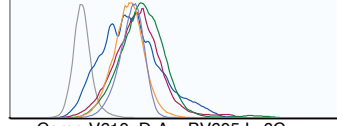

Comp-V610\_D-A :: BV605 Ly6C

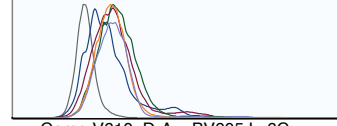

Comp-V610\_D-A :: BV605 Ly6C

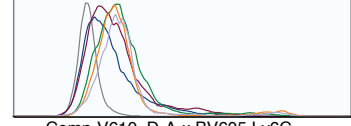

Comp-V610\_D-A :: BV605 Ly6C

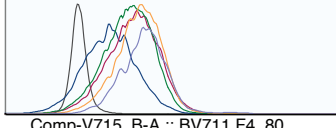

Comp-V715\_B-A :: BV711 F4\_80

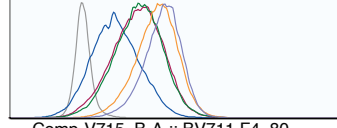

Comp-V715\_B-A :: BV711 F4\_80

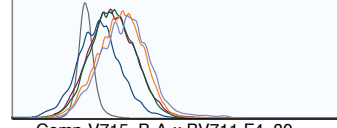

Comp-V715\_B-A :: BV711 F4\_80

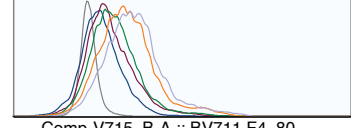

Comp-V715\_B-A :: BV711 F4\_80

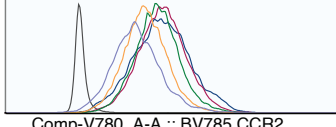

Comp-V780\_A-A :: BV785 CCR2

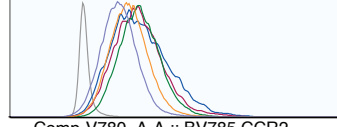

Comp-V780\_A-A :: BV785 CCR2

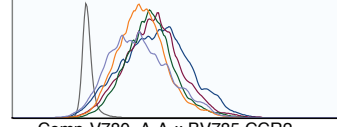

Comp-V780\_A-A :: BV785 CCR2

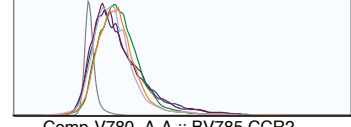

Comp-V780\_A-A :: BV785 CCR2

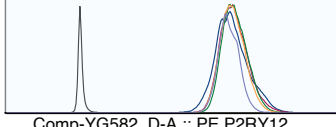

Comp-YG582\_D-A :: PE P2RY12

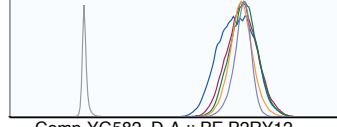

Comp-YG582\_D-A :: PE P2RY12

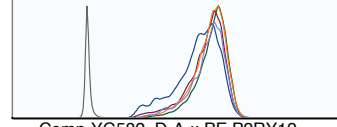

Comp-YG582\_D-A :: PE P2RY12

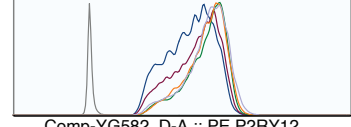

Comp-YG582\_D-A :: PE P2RY12

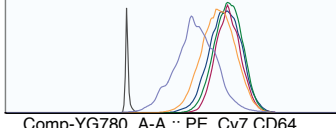

Comp-YG780\_A-A :: PE\_Cy7 CD64

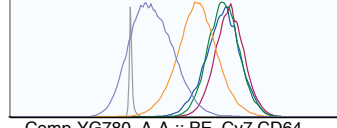

Comp-YG780\_A-A :: PE\_Cy7 CD64

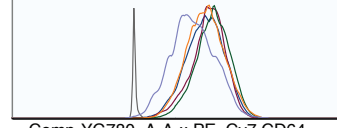

Comp-YG780\_A-A :: PE\_Cy7 CD64

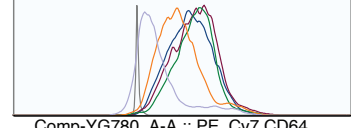

Comp-YG780\_A-A :: PE\_Cy7 CD64

dpi 0

dpi 4

dpi 5

dpi 6

dpi 7

Uns. cells
